# Supplementary material for: Development of a S-adenosylmethionine analog that intrudes the RNA-cap binding site of Zika methyltransferase
Source: PubMed Central journal article supplement (PMC5431627; doi:10.1038/s41598-017-01756-7), 2017-05-09
Supplement: 41598_2017_1756_MOESM1_ESM.pdf [file 41598_2017_1756_MOESM1_ESM.pdf]

## **Supplementary Information**

### **Development of a S-adenosylmethionine analog that intrudes the RNA-cap binding site of Zika methyltransferase**

Rinku Jain<sup>1</sup>, Kyle V. Butler<sup>1</sup>, Javier Coloma<sup>1</sup>, Jian Jin<sup>1</sup> and Aneel K. Aggarwal<sup>1¶</sup>

<sup>1</sup>Department of Pharmacological Sciences  
Icahn School of Medicine at Mount Sinai  
1425 Madison Avenue  
New York, New York, USA

**Supplementary Table 1: Data collection and refinement statistics**

| ZIKV NS5-MTase <sub>MS2042</sub>                                   |                                      |
|--------------------------------------------------------------------|--------------------------------------|
| <b>Data collection</b>                                             |                                      |
| Space group                                                        | P 2(1)                               |
| Cell dimensions                                                    |                                      |
| <i>a</i> , <i>b</i> , <i>c</i> (Å)                                 | 38.99, 111.23, 77.40                 |
| $\alpha$ , $\beta$ , $\gamma$ (°)                                  | 90.0, 93.9, 90.0                     |
| Resolution (Å)                                                     | 50 - 1.55 (1.58 - 1.55) <sup>a</sup> |
| <sup>b</sup> <i>R</i> <sub>sym</sub>                               | 0.069 (0.601)                        |
| <i>I</i> / $\sigma$ ( <i>I</i> )                                   | 23.1 (2.4)                           |
| Completeness (%)                                                   | 99.9 (97.8)                          |
| Redundancy                                                         | 6.3 (3.3)                            |
| <b>Refinement</b>                                                  |                                      |
| Resolution (Å)                                                     | 35.7-1.55                            |
| No. reflections                                                    | 95009                                |
| <sup>c,d</sup> <i>R</i> <sub>work</sub> / <i>R</i> <sub>free</sub> | 0.173 / 0.199                        |
| No. atoms                                                          |                                      |
| Protein                                                            | 4183                                 |
| MS2042 / others                                                    | 68 / 42                              |
| Water                                                              | 601                                  |
| <i>B</i> factors (Å <sup>2</sup> )                                 |                                      |
| Protein                                                            | 27.4                                 |
| MS2042/others                                                      | 23.7 / 42.4                          |
| Water                                                              | 40.9                                 |
| R.m.s. deviations                                                  |                                      |
| Bond lengths (Å)                                                   | 0.006                                |
| Bond angles (°)                                                    | 0.845                                |

<sup>a</sup>Values in parentheses are for highest-resolution shell.

<sup>b</sup>  $R_{\text{sym}} = \sum |I - \langle I \rangle| / \sum I$ , where *I* is the integrated intensity of a given reflection.

<sup>c</sup>  $R_{\text{cryst}} = \sum ||F_{\text{observed}}| - |F_{\text{calculated}}|| / \sum |F_{\text{observed}}|$

<sup>d</sup>For *R*<sub>free</sub> calculations, 5 % of data excluded from refinement were used

## a Synthesis of MS2042

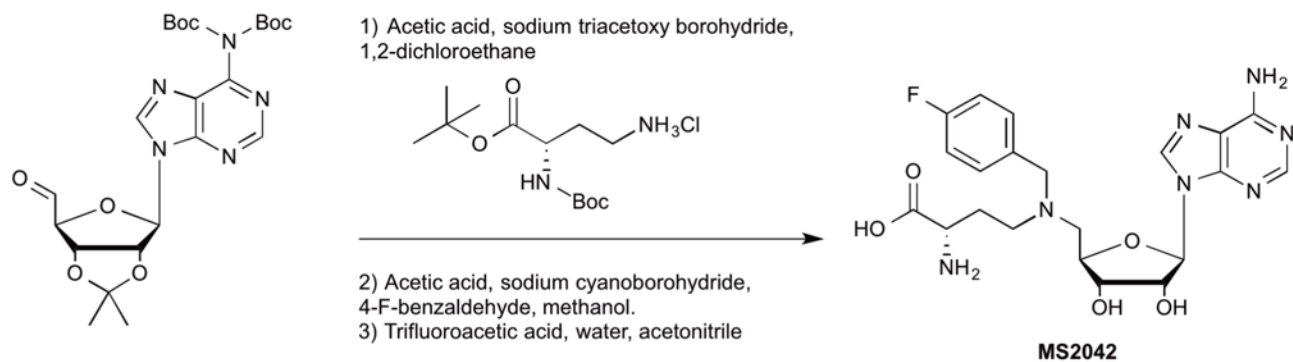

## b Size exclusion profile for ZIKV NS5-MTase

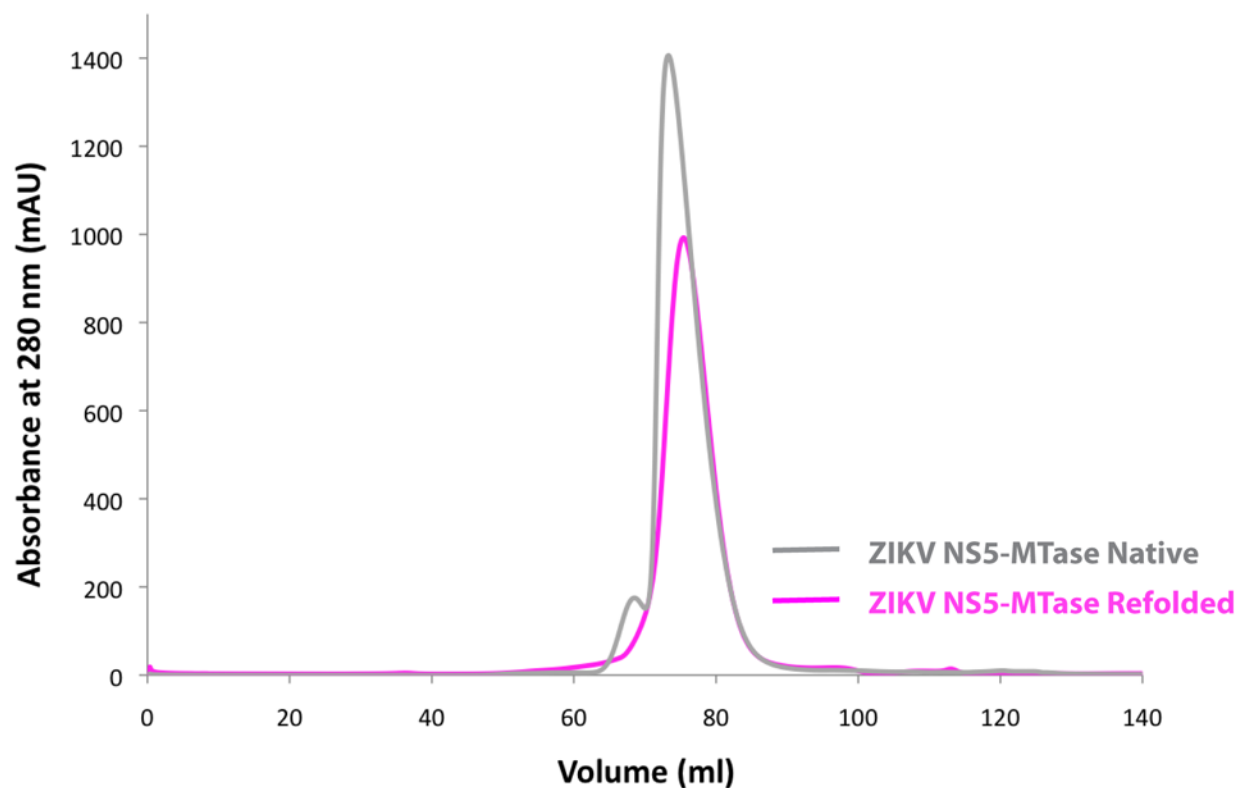

### Supplementary Figure 1

(a) Synthesis scheme for MS2042. (b) Size exclusion chromatography traces for ZIKV NS5-MTase<sub>SAM</sub> and refolded NS5-MTase. ZIKV NS5-MTase<sub>SAM</sub> was denatured in 8 M urea to remove endogenous SAM/SAH, and then refolded and purified by dialysis and size exclusion chromatography.

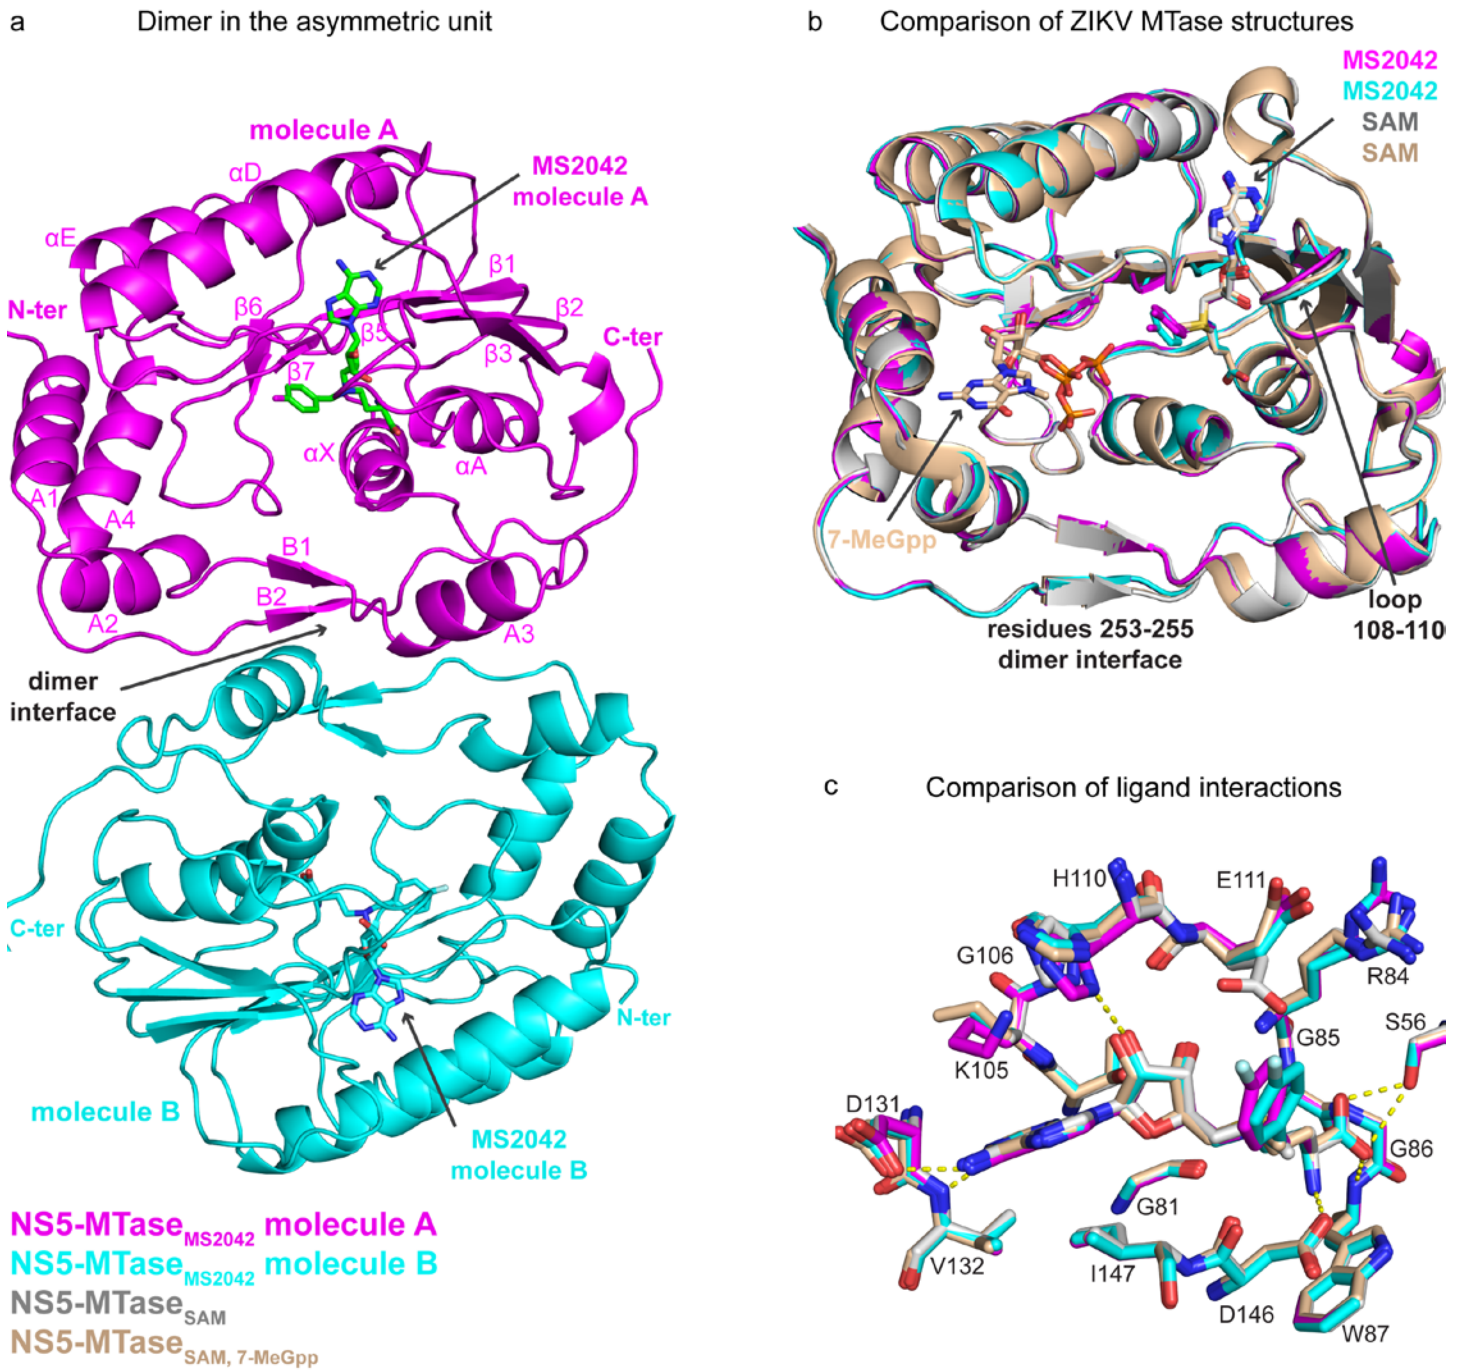

### Supplementary Figure 2

**Contents of the asymmetric unit and comparison of ZIKV MTase structures.** (a) The asymmetric unit of ZIKV NS5-MTase<sub>MS2042</sub> has two protein molecules (b) The two protein chains are nearly identical to each other and to ZIKV NS5-MTase<sub>SAM</sub> (gray) and NS5-MTase<sub>SAM,7-MeGpp</sub> (tan) (c) Comparison of SAM/MS2042 interactions. Solvent mediated interactions have been omitted for clarity. Direct hydrogen bonding interactions between MS2042 and the ZIKV NS5-MTase are shown as dashed lines

a ZIKV NS5-MTase<sub>MS2042</sub> and human CMTr1

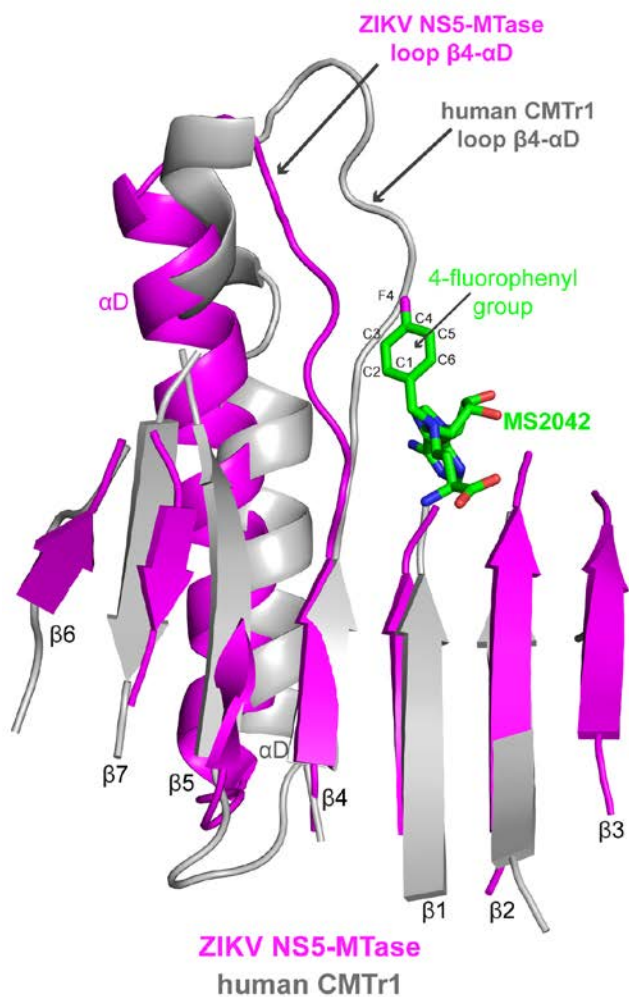

b ZIKV NS5-MTase<sub>MS2042</sub> and human RNMT

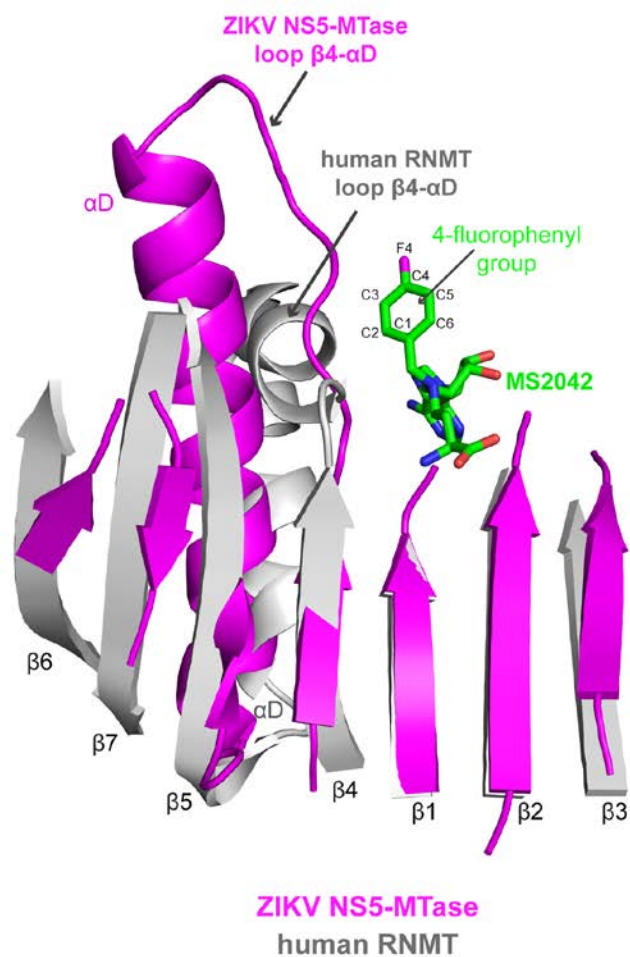

### Supplementary Figure 3

#### Superimposition of ZIKV NS5-MTase<sub>MS2042</sub> and human mRNA methyltransferases.

Comparison of ZIKV NS5-MTase<sub>MS2042</sub> with (a) human mRNA nucleoside-2'-O methyltransferase (CMTr1, PDB id 4N49), and (b) human mRNA cap guanine-N7 methyltransferase (RNMT, PDB id 3EPP). MS2042 (green) was modeled into CMTr1 and RNMT by superimposing the seven-stranded Rossmann fold of each with that of ZIKV NS5-MTase<sub>MS2042</sub> such that good agreement was obtained between ZIKV NS5-MTase bound MS2042 and SAM/sinefungin in CMTr1 (4N49) and RNMT (3EPP) respectively. The  $\beta$ 4- $\alpha$ D loop is labeled.

MS2042

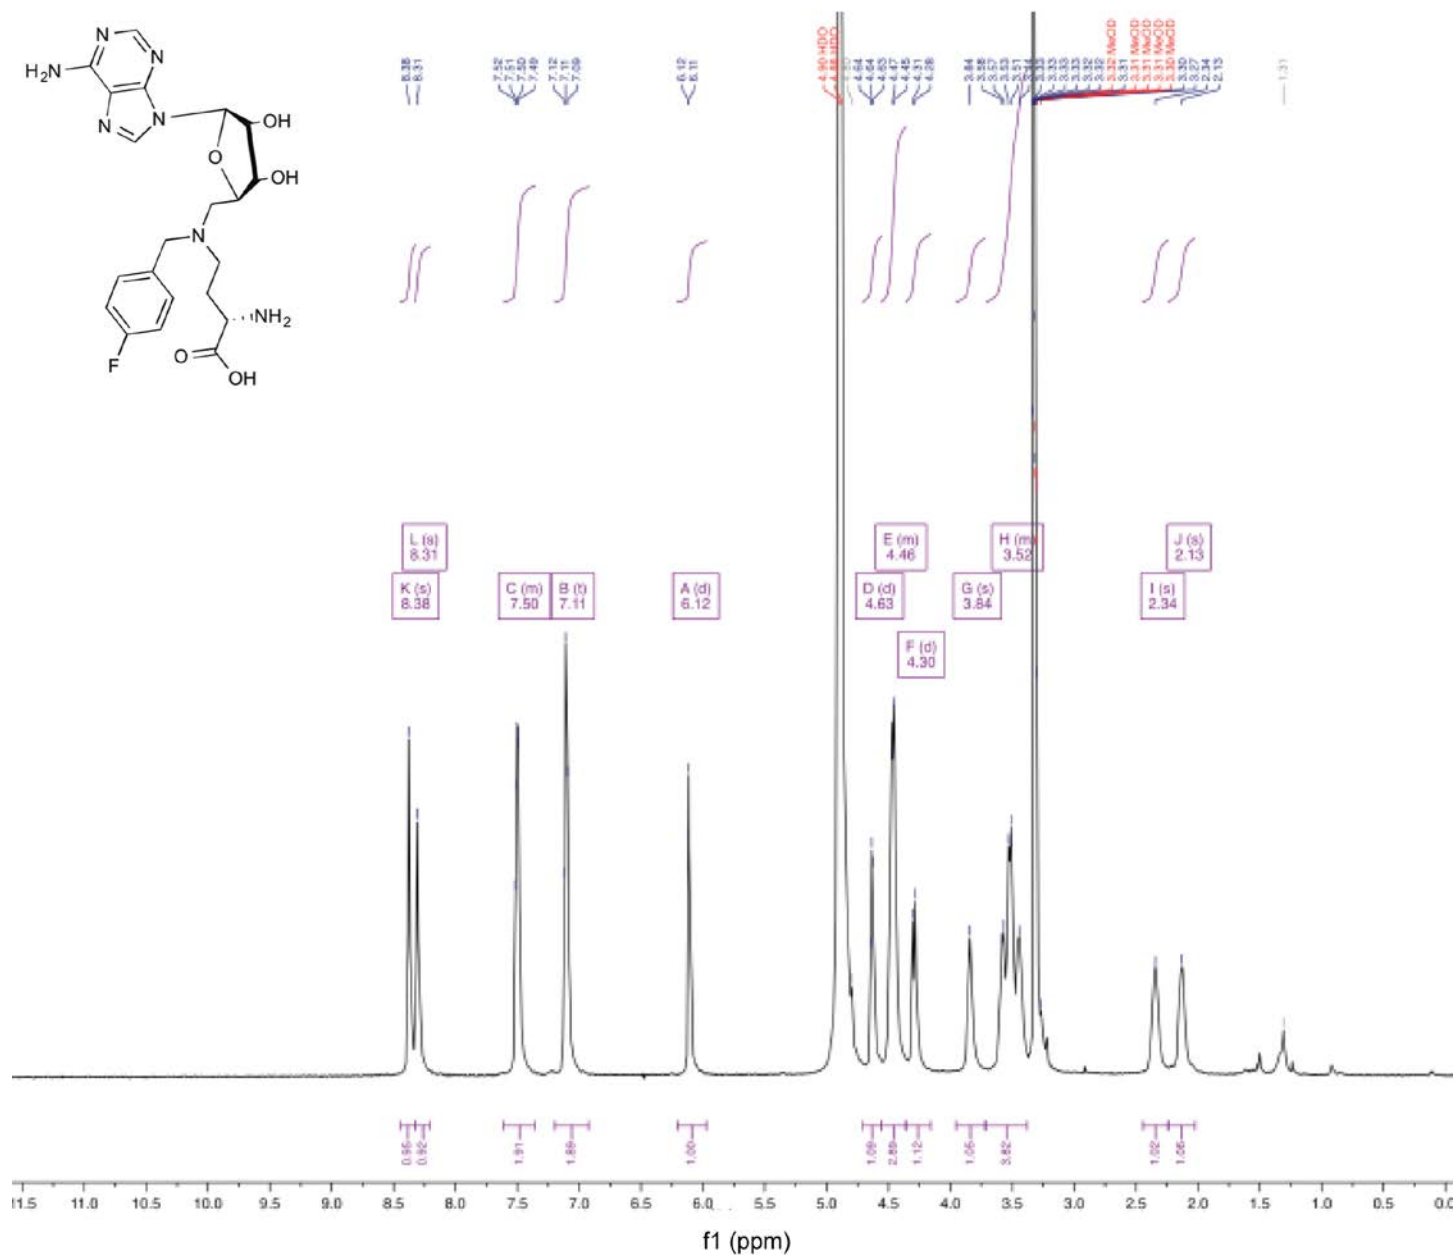

Supplementary Figure 4

<sup>1</sup>H NMR spectrum of MS2042
